# Supplementary material
Source: MDPI journal article supplement (https://www.mdpi.com/2075-4701/3/2/159)
Supplement: s1 [file s1]

**Supplementary Information**

**Figure S1.** SEM-BEI microstructure of Fe50Ni16Mo6B18Zr10 (Zr2, W) with SEM apparatus equipped with Focus ion beam (FIB) (thanks to retired Dr Pastol). (**a**) the sample border and (**b**) center. The fibrous microstructure is a wrinkled pattern where straight and curved lines are observed. Note that CZU has various orientations that lead to the construction of lozenge and hexagonal-type shapes.

| (a) | (b) |
| --- | --- |

**Figure S2.** (**a**) SEM-EDS maps of Fe50Ni16Mo6B18Zr10 (Zr2, W) showing the distribution of the four alloying elements except boron. The filtered last SEM-BEI image suggests a microstructure formed by wrinkled surfaces.

**Figure S3.** SEM-EDS maps of the inward area just after that of Figure 8 of Fe50Ni16Mo6B18Zr10 (Zr2, I) quenched in cold water showing Fe, Zr and Mo distribution; spots of signs indicated the matching of peculiar features.

**Figure S4.** (**a**) SEM-EDS maps of Fe66Mo6B18Zr10 (Zr3, S) image showing the distribution of FE, Zr and Mo elements except boron. The distribution indicates the Zr-rich areas (see the wrinkled arrow); (**b**) SEM-EDS maps for the protrusion circled in (**a**); the same maps feature is obtained with highlights of wrinkled patterns on Zr and by close observation on Fe map.

**Figure S5.** Optical micrographs of Fe66Mo6B18Zr10 (Zr3, S). (**a**) Typical microstructure of amorphous ribbons; (**b**) Involvement of the wrinkles in the formation of the puddle;
(**c**) Wrinkled area showing the lozenge-type morphology; (**d**) Distribution of wrinkles constituted by the melt filets over the surface.

**Figure S6.** Optical micrographs of Fe50Ni16Mo6B18Zr10 (Zr2, S). (**a**–**d**) various sized melt filets involved in the construction of the longitudinal puddle.

**Figure S7.** SEM-EDS maps of Fe66Mo6B18Zr10 (Zr3, S) cross section showing the distribution of the three alloying elements except boron.

**Figure S8.** TEM-BF micrographs of Fe50Ni16Mo6B18Zr10 (C8) showing the distribution and peculiar details of the needles and wrinkles; labels 1 to 7 relate to the magnification of the indicated areas on the main image (**c**). The reader should carefully pay attention to the shapes described in the observations’ guidelines (see text).
